# Supplementary material for: Emissions of terpenoids, benzenoids, and other biogenic gas-phase organic compounds from agricultural crops and their potential implications for air quality
Source: Copernicus journal article supplement (doi:10.5194/acp-14-5393-2014), 2014-06-03
Supplement: Supplementary file 1 [file acp-14-5393-2014-supplement.pdf]

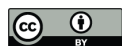

*Supplement of*

**Emissions of terpenoids, benzenoids, and other biogenic gas-phase organic compounds from agricultural crops and their potential implications for air quality**

**D. R. Gentner et al.**

*Correspondence to:* D. R. Gentner ([drew.gentner@yale.edu](mailto:drew.gentner@yale.edu))

## Supplementary Material for:

### Emissions of terpenoids, benzenoids, and other biogenic gas-phase organic compounds from agricultural crops and their potential implications for air quality

Drew R. Gentner<sup>1\*</sup>, Elena Ormeño<sup>2,3</sup>, Silvano Fares<sup>2,4</sup>, Trevor B. Ford<sup>5</sup>, Robin Weber<sup>2</sup>, Jeong-Hoo Park<sup>2</sup>, Jerome Brioude<sup>6,7</sup>, Wayne M. Angevine<sup>6,7</sup>, John F. Karlik<sup>8</sup>, and Allen H. Goldstein<sup>1,2</sup>

<sup>1</sup> Department of Civil and Environmental Engineering, University of California, Berkeley, CA 94720, USA.

<sup>2</sup> Department of Environmental Science, Policy and Management, University of California, Berkeley, CA, 94720, USA.

<sup>3</sup> Aix-Marseille Université - Institut méditerranéen de biodiversité et écologie IMBE CNRS UMR 7263, France.

<sup>4</sup> Consiglio per la Ricerca e la sperimentazione in Agricoltura (CRA)- Research Centre for the Soil-Plant System, Rome, Italy.

<sup>5</sup> Department of Chemistry University of California, Berkeley, CA, 94720, USA.

<sup>6</sup> Cooperative Institute for Research in Environmental Sciences, University of Colorado, Boulder, CO 80309, USA.

<sup>7</sup> Chemical Sciences Division, Earth System Research Laboratory, National Oceanic and Atmospheric Administration, Boulder, CO 80305, USA.

<sup>8</sup> University of California Cooperative Extension, Kern County.

\* Corresponding author: Drew Gentner (drew.gentner@yale.edu), now at: Department of Chemical & Environmental Engineering, Yale University, New Haven, CT, 06511, USA

Summary of Supporting Information: 12 Pages (excluding cover)

#### Tables

- S1: Plants studied during greenhouse enclosure campaign
- S2: Statistics for modeling methods using light and temperature (L&T) and temperature only (T) from enclosure studies
- S3: Composition of monoterpene emissions measured in enclosure studies
- S4: Composition of oxygenated monoterpene emissions measured in enclosure studies
- S5: Composition of sesquiterpene emissions measured in enclosure studies
- S6: Basal emission factors ( $\text{ngC gDM}^{-1} \text{h}^{-1}$ ) and beta values for methanol, acetaldehyde, acetone and isoprene for non-citrus crop plants studied in greenhouse
- S7: Observed isoprene fluxes (with environmental parameters) for plants studied during greenhouse enclosure campaign

#### Figures

- S1: Map of the San Joaquin Valley showing distribution of urban areas and agriculture
- S2: Example chromatogram from the Lindcove in spring 2010 during flowering with a selection of prominent biogenic compounds shown on representative mass to charge ( $m/z$ ) ratios.
- S3: BVOC transport: Observations of limonene vs. p-cymene at Bakersfield site
- S4: Spatial distribution of individual monoterpene emissions transported to Bakersfield

## Emission Algorithms

### Temperature and Light (Guenther et al., 1993):

$$E_{L+T} = BEF \left[ \frac{\alpha C_L PAR}{\sqrt{1 + \alpha^2 PAR^2}} \right] * \left[ \frac{\exp\left(\frac{C_{T1}(T - T_s)}{RT_s T}\right)}{0.961 + \exp\left(\frac{C_{T2}(T - T_M)}{RT_s T}\right)} \right] \quad (S1)$$

Empirical coefficients:

$$C_L = 1.066$$

$$C_{T1} = 95000 \text{ J mol}^{-1}$$

$$C_{T2} = 230000 \text{ J mol}^{-1}$$

$$C_{T3} = 0.961$$

$$\alpha = 0.0027$$

$$T_M = 314 \text{ K}$$

$$R \text{ (universal gas constant)} = 8.314 \text{ J K}^{-1} \text{ mol}^{-1}$$

Variables:

T: leaf temperature (K)

$T_s$ : leaf temperature at standard conditions (303 K)

Emission rates, also referred to as fluxes, are in terms of compound mass per mass dry leaf matter per time (e.g. ngC gDM<sup>-1</sup> h<sup>-1</sup>). Using information on the mass to area of a species' leaves and the leaf density of a canopy, this emission rate can be converted to carbon mass per area ground cover per time (e.g. gC m<sup>-2</sup> h<sup>-1</sup>).

### Temperature Only (Guenther et al., 1993):

$$E_T = BEF \exp[\beta(T - T_s)] \quad (S2)$$

$\beta$  (K<sup>-1</sup>): a coefficient that scales the exponential dependence on temperature and is calculated by inverting equation S2 using the BEF calculated from samples that meet standard conditions



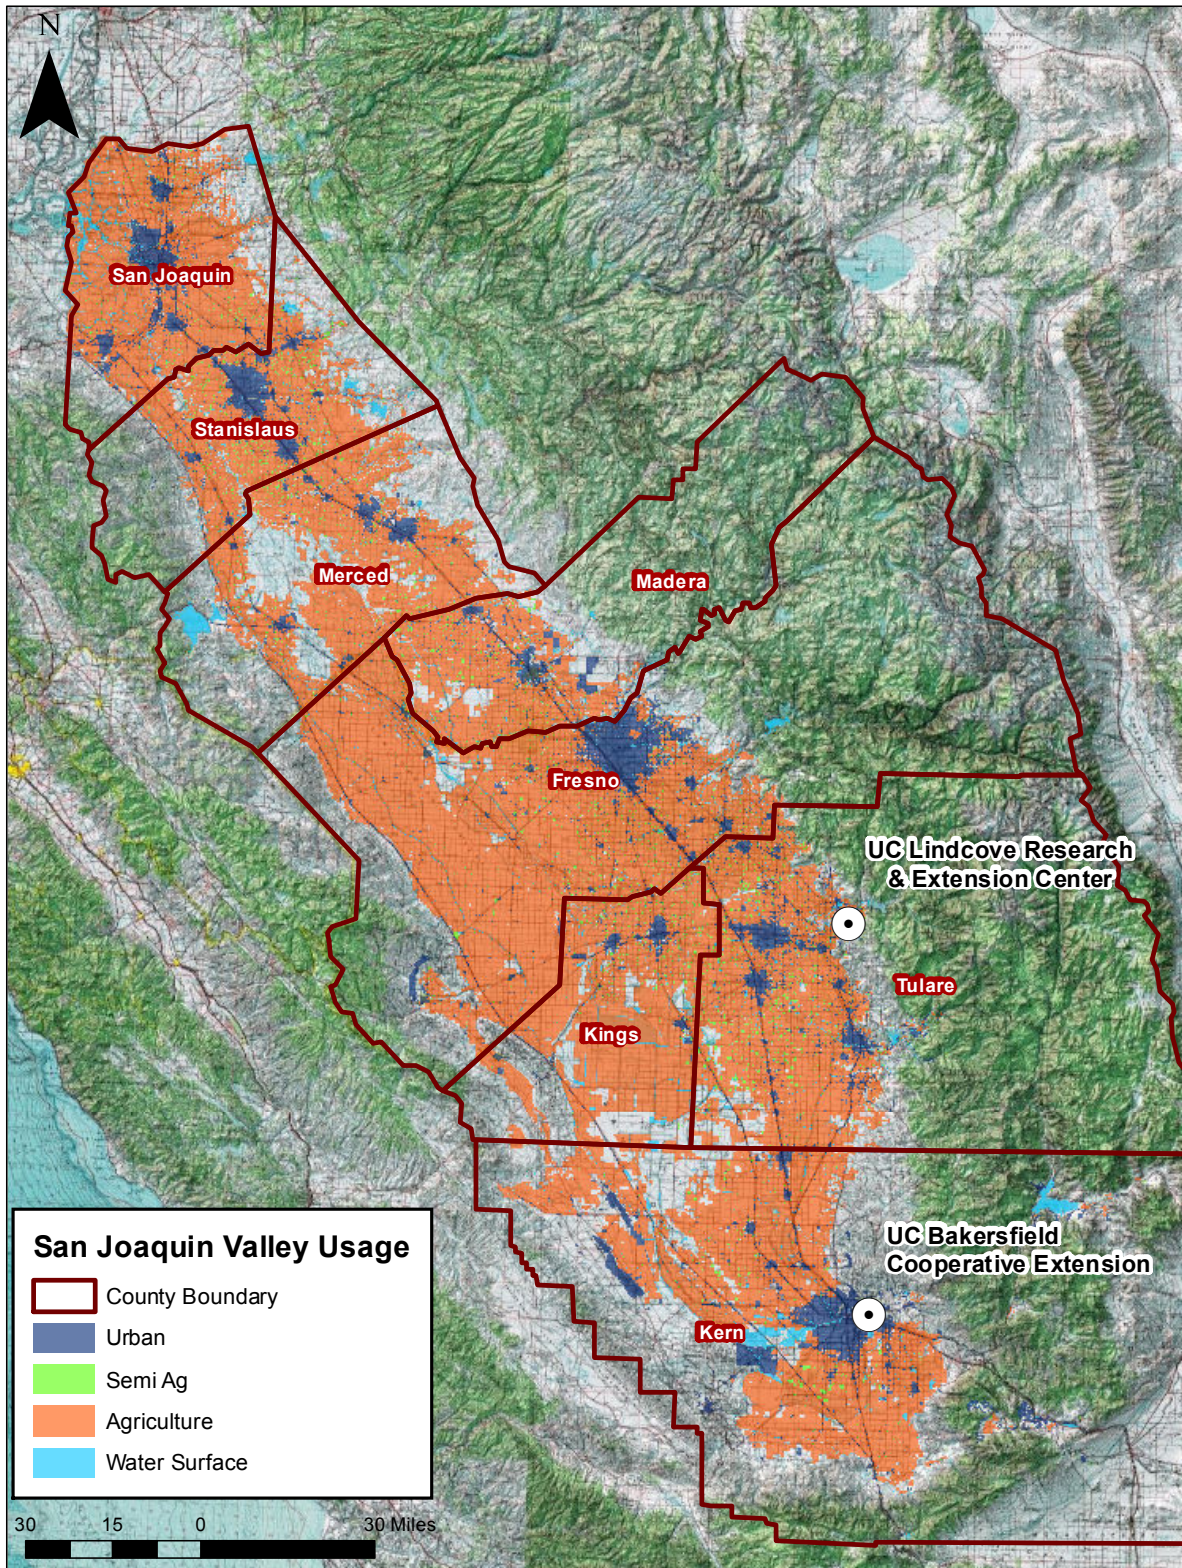

Figure S1: Map of the San Joaquin Valley showing distribution of urban areas and agriculture (note: semi ag represents mainly dairies)

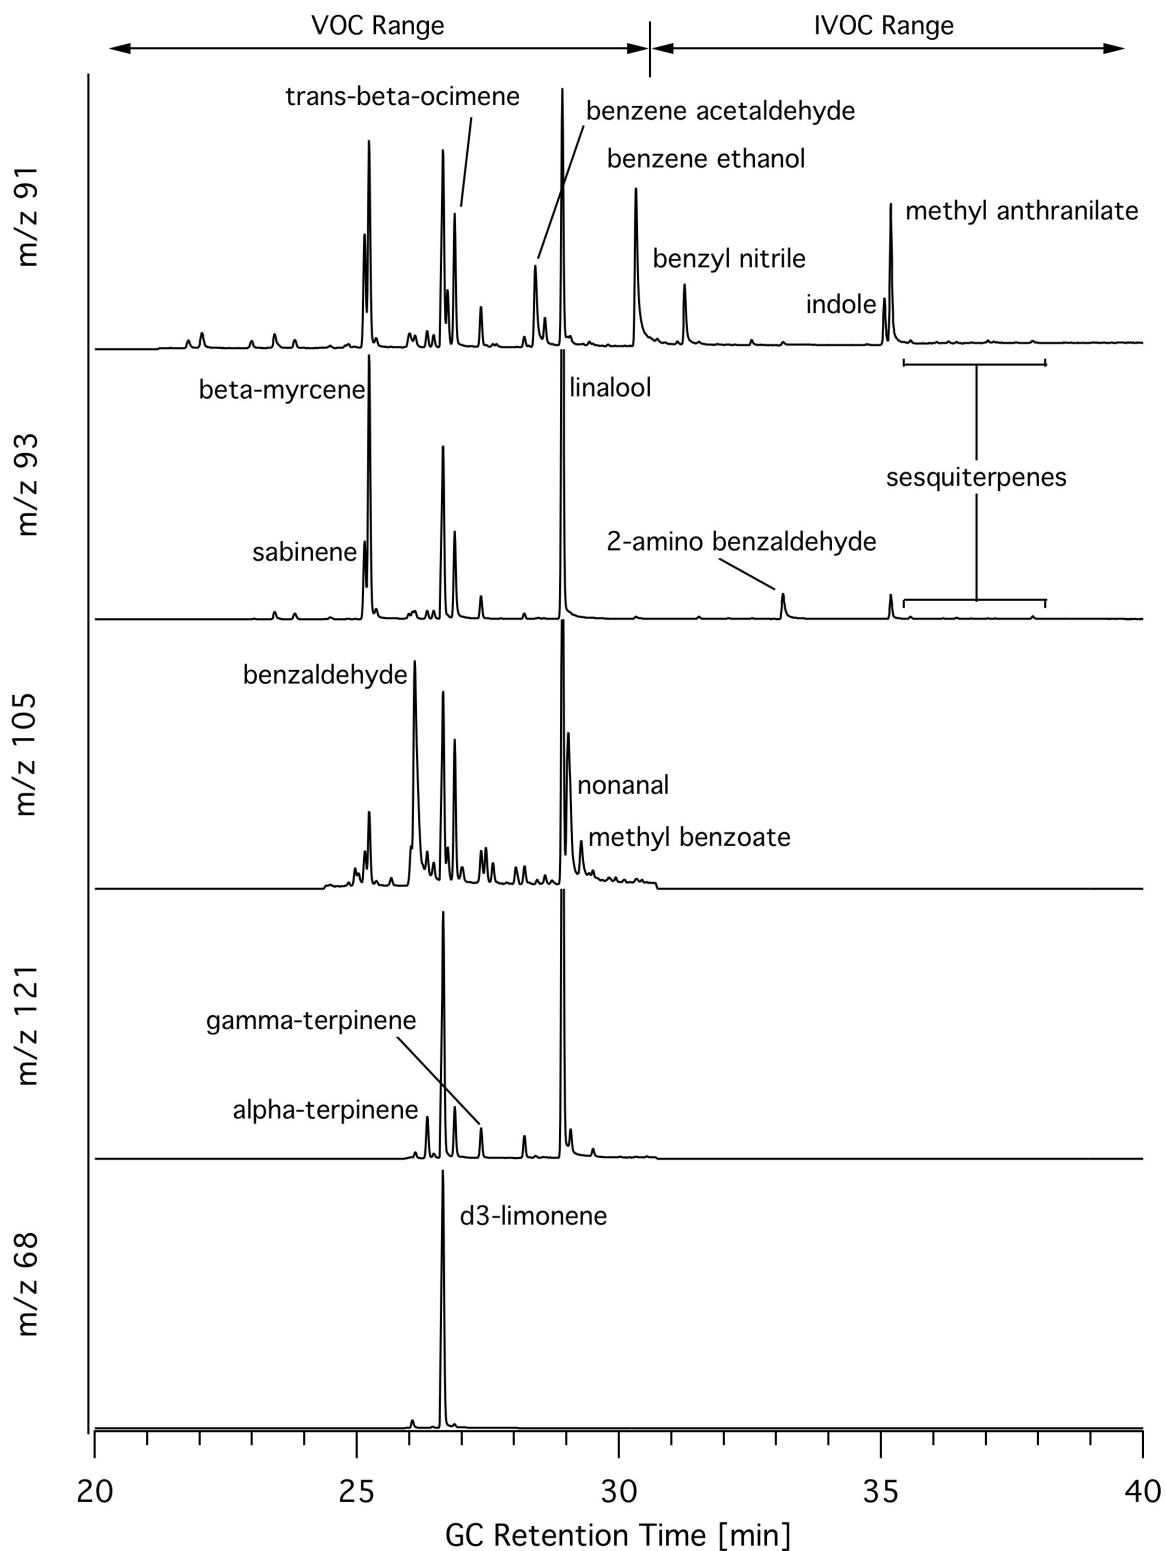

Figure S2: Example chromatogram from the Lindcove orange orchard in spring 2010 during flowering. A selection of the most prominent biogenic compounds are shown on representative mass to charge ( $m/z$ ) ratios.



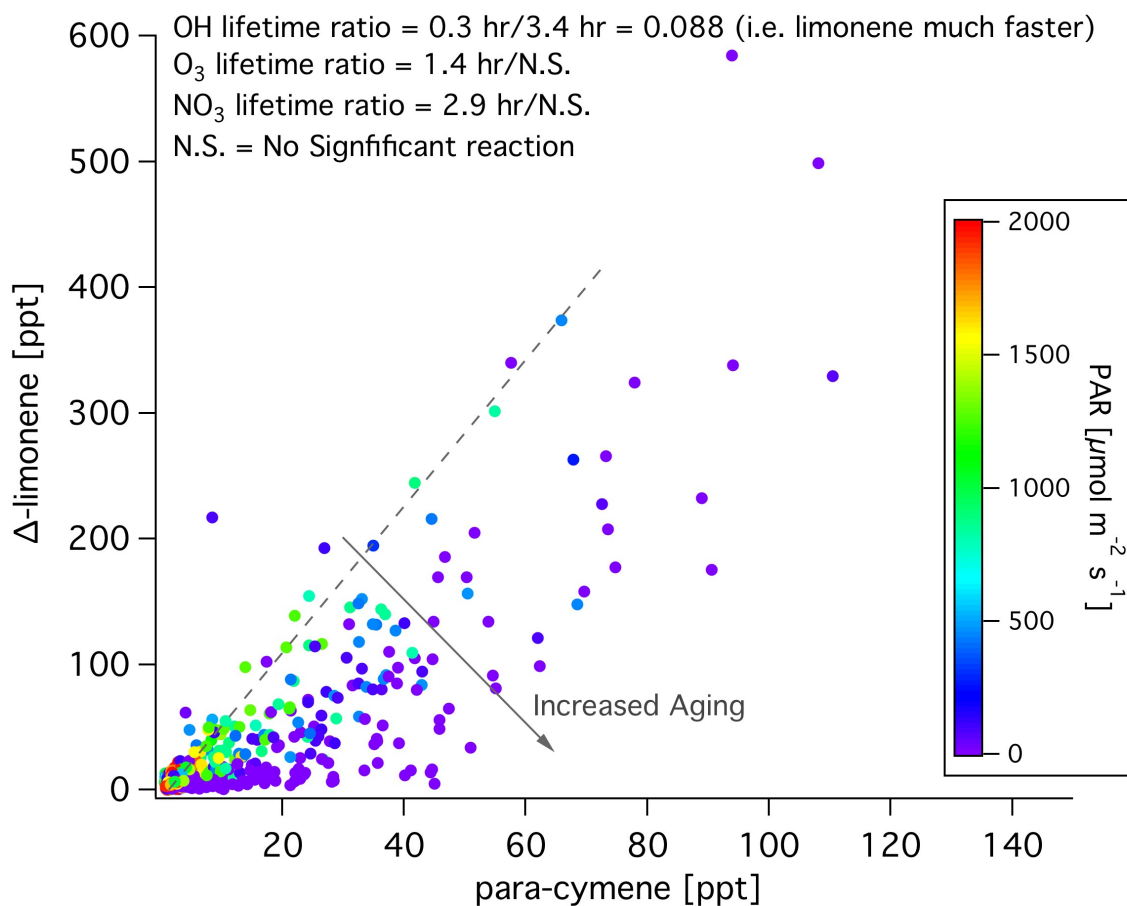

Figure S3: BVOC transport in the San Joaquin Valley: Observations of monoterpene pair  $\Delta$ -limonene and p-cymene at Bakersfield site. Ratios of lifetimes to all three atmospheric oxidants show faster processing of  $\Delta$ -limonene. Given the concentrations of radicals, OH oxidation has the fastest timescales and the importance of OH oxidation is also indicated by the most aged parcels coinciding with PAR (representative of OH production). Reaction with ozone is likely to also play a role. See Figure 7 for other comparisons.

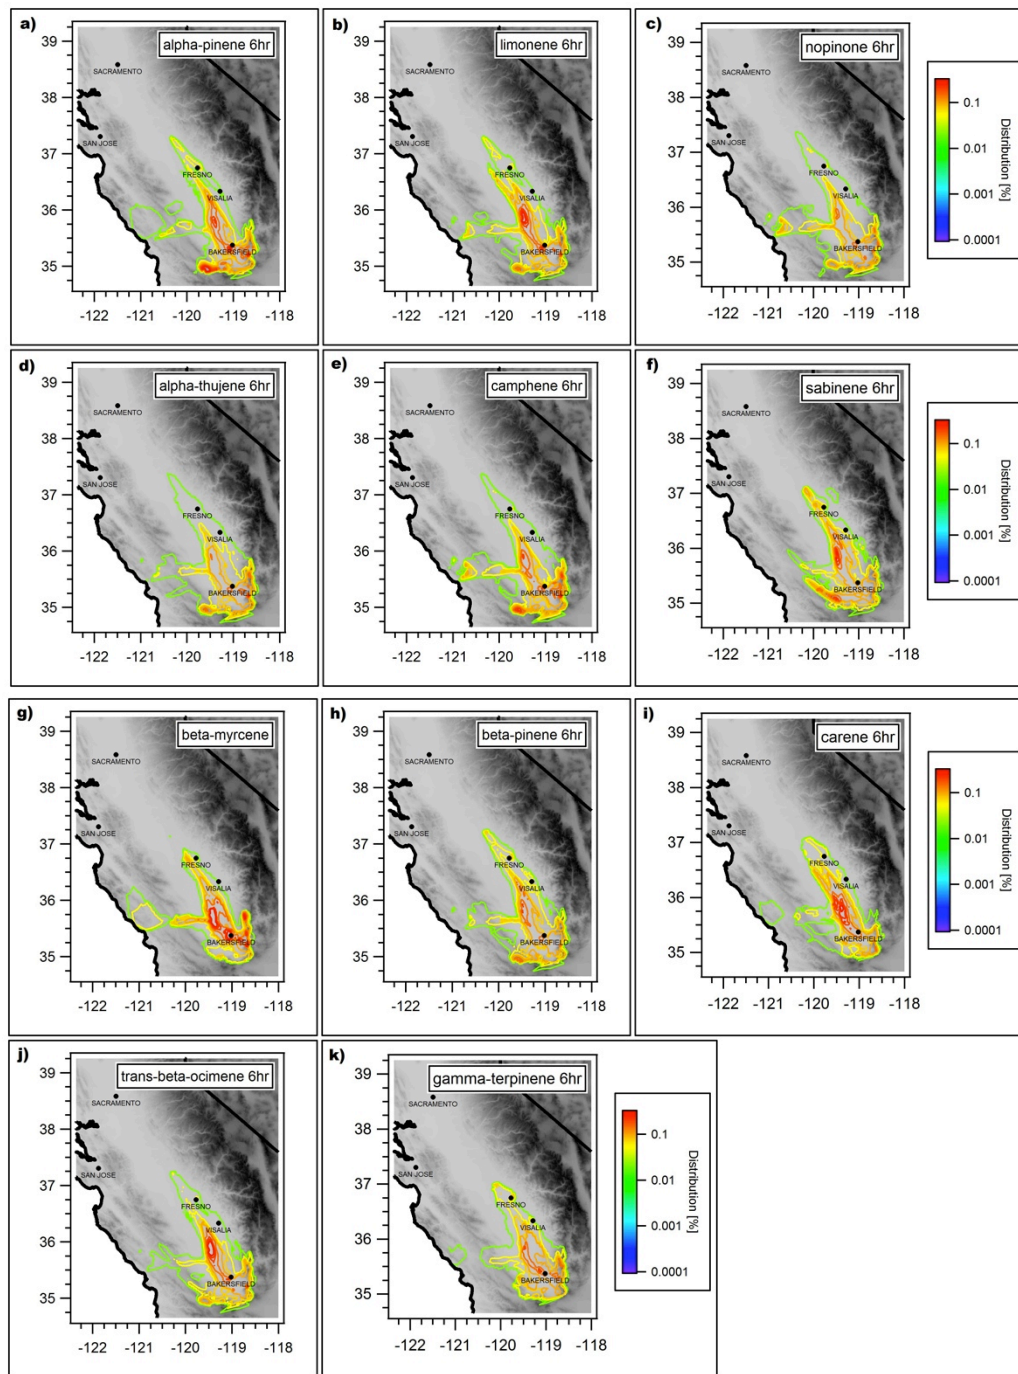

Figure S4: Spatial distribution of individual monoterpene emissions transported to Bakersfield. Together they comprise the map shown in figure 8.

Table S1: Plants studied during greenhouse enclosure campaign

| Common Name                     | Scientific Name            | Variety and Type                           |
|---------------------------------|----------------------------|--------------------------------------------|
| <b><i>Herbaceous plants</i></b> |                            |                                            |
| Alfalfa                         | Medicago sativa L.         | Lucerne                                    |
| Carrot 1                        | Daucus carota L.           | Bolero Nantes                              |
| Carrot 2                        | Daucus carota L.           | Red Label                                  |
| Corn (Maize)                    | Zea mays L.                | Eureka                                     |
| Cotton 1                        | Gossypium barbadense L.    | Pima                                       |
| Cotton 2                        | Gossypium hirsutum L.      | Upland                                     |
| Onion                           | Allium cepa L.             | Walla Walla                                |
| Potato                          | Solanum tuberosum L.       | Red La Soda                                |
| Tomato                          | Lycopersicon esculentum L. | Mortgage Lifter                            |
| <b><i>Woody plants</i></b>      |                            |                                            |
| Almond                          | Prunus dulcis Mill. D.Webb | Nonpareil                                  |
| Apricot                         | Prunus armeniaca L.        | Blenheim                                   |
| Cherry                          | Prunus avium L.            | Bing                                       |
| Grape 1                         | Vitis vinifera L.          | Crimson Seedless (Table Variety)           |
| Grape 2                         | Vitis vinifera L.          | Pinot Noir (Wine Variety)                  |
| Lemon                           | Citrus limon L.            | Allen Eureka (on Cuban Shaddock rootstock) |
| Mandarin                        | Citrus reticulata          | W. Murcott (on C-35 rootstock)             |
| Mandarin                        | Citrus reticulate          | Clementine (Clemenules)(on C-35 rootstock) |
| Olive                           | Olea europaea L.           | Manzanillo                                 |
| Orange                          | Citrus sinensis L. Osbeck  | Parent Navel (on Volk rootstock)           |
| Peach                           | Prunus persica L. Batsch.  | Carson                                     |
| Pistachio                       | Pistacia vera L.           | Kerman                                     |
| Plum                            | Prunus salicina Lindley    | Satsuma                                    |
| Pomegranate                     | Punica granatum L.         | Wonderful                                  |



Table S2: Statistics for modeling methods using light and temperature (L&amp;T) and temperature only (T) from greenhouse enclosures

| Crop                | Monoterpenes |       |       |       | Oxygenated Monoterpenes |       |       |       | Sesquiterpenes |       |       |       |
|---------------------|--------------|-------|-------|-------|-------------------------|-------|-------|-------|----------------|-------|-------|-------|
|                     | L&T          |       | T     |       | L&T                     |       | T     |       | L&T            |       | T     |       |
|                     | $r^2$        | Slope | $r^2$ | Slope | $r^2$                   | Slope | $r^2$ | Slope | $r^2$          | Slope | $r^2$ | Slope |
| Alfalfa             | 0.72         | 1.36  | 0.7   | 0.92  |                         |       |       |       |                |       |       |       |
| Almond              | 0.6          | 0.36  | 0.61  | 0.27  | 0.72                    | 1.41  | 0.84  | 0.89  | 0.62           | 3.26  | 0.94  | 0.81  |
| Carrot (RL)         | N.S.         | N.S.  | N.S.  | N.S.  | N.S.                    | N.S.  | N.S.  | N.S.  |                |       |       |       |
| Carrot (BN)         | 0.14         | 0.4   | 0.11  | 0.24  |                         |       |       |       | N.S.           | N.S.  | N.S.  | N.S.  |
| Cherry              | 0.64         | 2.52  | 0.6   | 1.37  | 0.69                    | 1.57  | 0.78  | 0.87  |                |       |       |       |
| Corn                |              |       |       |       |                         |       |       |       |                |       |       |       |
| Cotton Pima         | N.S.         | N.S.  | N.S.  | N.S.  | 0.32                    | 0.4   | 0.34  | 0.27  |                |       |       |       |
| Cotton Upland       | 0.51         | 1.02  | 0.43  | 0.66  | N.S.                    | N.S.  | N.S.  | N.S.  |                |       |       |       |
| Table Grape         | N.S.         | N.S.  | N.S.  | N.S.  | 0.11                    | 0.68  | 0.11  | 0.28  | 0.25           | 0.56  | 0.28  | 0.32  |
| Wine Grape          | 0.11         | 0.43  | N.S.  | N.S.  | N.S.                    | N.S.  | N.S.  | N.S.  | 0.14           | 0.35  | N.S.  | N.S.  |
| Liquidambar         | 0.5          | 0.16  | 0.63  | 0.17  | 0.64                    | 1.65  | 0.81  | 1.07  |                |       |       |       |
| Miscanthus          | 0.7          | 1.23  | 0.73  | 0.97  | 0.25                    | 0.94  | 0.5   | 0.7   | 0.35           | 1.18  | 0.47  | 0.7   |
| Olive               | 0.98         | 0.26  | 0.84  | 0.16  | 0.47                    | 1.4   | 0.28  | 0.42  |                |       |       |       |
| Onion               | N.S.         | N.S.  | N.S.  | N.S.  |                         |       |       |       |                |       |       |       |
| Peach               | 0.96         | 1.78  | 0.97  | 1.17  | 0.93                    | 1.84  | 0.95  | 1.21  |                |       |       |       |
| Pistachio           | 0.15         | 0.18  | 0.17  | 0.16  | N.S.                    | N.S.  | N.S.  | N.S.  |                |       |       |       |
| Plum                | 0.13         | 0.21  | N.S.  | N.S.  | 0.4                     | 1.08  | 0.25  | 0.69  |                |       |       |       |
| Pomegranate         | N.S.         | N.S.  | N.S.  | N.S.  | 0.63                    | 1.01  | 0.69  | 0.68  | 0.29           | 1.87  | N.S.  | N.S.  |
| Potato              | 0.12         | 1.31  | 0.2   | 0.53  | 0.12                    | 0.13  | N.S.  | N.S.  | N.S.           | N.S.  | N.S.  | N.S.  |
| Tomato              | 0.33         | 0.18  | 0.27  | 0.11  |                         |       |       |       | N.S.           | N.S.  | N.S.  | N.S.  |
| Orange (no flowers) | 0.57         | 0.74  | 0.63  | 0.61  | 0.44                    | 0.84  | 0.68  | 0.87  | 0.88           | 2.14  | 0.8   | 1.17  |
| Orange (flowers)    | 0.6          | 0.78  | 0.61  | 0.58  | 0.43                    | 1.37  | 0.37  | 0.74  | 0.92           | 2.13  | 0.89  | 1.11  |
| Mandarin W. Murcott | 0.32         | 0.08  | 0.41  | 0.08  | 0.18                    | 0.26  | 0.34  | 0.4   |                |       |       |       |
| Mandarin Clementine | N.S.         | N.S.  | N.S.  | N.S.  |                         |       |       |       |                |       |       |       |
| Lemon Eureka        | N.S.         | N.S.  | N.S.  | N.S.  |                         |       |       |       |                |       |       |       |

N.S.: Results not significant ( $r^2 < 0.10$  or negative slope)

Slopes are calculated as predicted emission rates (using calculated BEFs) vs. observed emission rates at measured light and temperature conditions.

Data on citrus species measured in the same greenhouse campaign are reproduced from Fares et al. (2011) for comparison to the other crops and assessment of implications on air quality. Table 2 gives information on sample size (N)

Note: A better reported coefficient of determination or slope does not imply our endorsement of a particular modeling method. When testing and using the crop survey data in this paper, users of this data should consult literature on the temperature or temperature & light dependence of a species and consider the relevant uncertainties in this study (discussed in Sections 3.1 and 3.1.1).

Table S3: Composition of monoterpene emissions measured in enclosure studies

| Crop                     | $\Delta$ -limonene | $\beta$ -cis-ocimene | $\beta$ -trans-ocimene | $\beta$ -myrcene | $\alpha$ -phellandrene | $\beta$ -phellandrene | $\Delta$ -3-carene | $\Delta$ -2-carene | $\alpha$ -terpinene | $\gamma$ -terpinene | $\alpha$ -thujene | sabinene | $\alpha$ -pinene | $\beta$ -pinene |
|--------------------------|--------------------|----------------------|------------------------|------------------|------------------------|-----------------------|--------------------|--------------------|---------------------|---------------------|-------------------|----------|------------------|-----------------|
| Alfalfa                  | 0%                 | 0%                   | 58%                    | 0%               | 0%                     | 0%                    | 0%                 | 0%                 | 0%                  | 0%                  | 0%                | 0%       | 42%              | 0%              |
| Almond                   | 9%                 | 0%                   | 23%                    | 36%              | 2%                     | 0%                    | 26%                | 0%                 | 0%                  | 0%                  | 0%                | 0%       | 3%               | 0%              |
| Carrot (RL)              | 28%                | 3%                   | 3%                     | 37%              | 0%                     | 1%                    | 3%                 | 0%                 | 11%                 | 6%                  | 0%                | 0%       | 6%               | 3%              |
| Carrot (BN)              | 2%                 | 19%                  | 1%                     | 23%              | 0%                     | 0%                    | 4%                 | 0%                 | 0%                  | 0%                  | 0%                | 15%      | 34%              | 1%              |
| Cherry                   | 0%                 | 94%                  | 6%                     | 0%               | 0%                     | 0%                    | 0%                 | 0%                 | 0%                  | 0%                  | 0%                | 0%       | 0%               | 0%              |
| Corn                     |                    |                      |                        |                  |                        |                       |                    |                    |                     |                     |                   |          |                  |                 |
| Cotton Pima              | 0%                 | 0%                   | 2%                     | 0%               | 0%                     | 0%                    | 0%                 | 0%                 | 0%                  | 0%                  | 0%                | 34%      | 64%              | 0%              |
| Cotton Upland            | 0%                 | 1%                   | 19%                    | 0%               | 0%                     | 39%                   | 0%                 | 0%                 | 0%                  | 0%                  | 0%                | 0%       | 41%              | 0%              |
| Table Grape              | 0%                 | 1%                   | 1%                     | 0%               | 0%                     | 0%                    | 0%                 | 0%                 | 0%                  | 0%                  | 0%                | 0%       | 98%              | 0%              |
| Wine Grape               | 0%                 | 0%                   | 23%                    | 0%               | 0%                     | 0%                    | 0%                 | 0%                 | 0%                  | 6%                  | 0%                | 64%      | 3%               | 4%              |
| Liquidambar              | 55%                | 0%                   | 0%                     | 0%               | 0%                     | 0%                    | 0%                 | 0%                 | 1%                  | 0%                  | 0%                | 17%      | 27%              | 0%              |
| Miscanthus               | 48%                | 4%                   | 23%                    | 0%               | 0%                     | 0%                    | 0%                 | 0%                 | 0%                  | 21%                 | 0%                | 2%       | 2%               | 0%              |
| Olive                    | 0%                 | 5%                   | 93%                    | 0%               | 0%                     | 0%                    | 1%                 | 0%                 | 0%                  | 0%                  | 0%                | 1%       | 0%               | 0%              |
| Onion                    | 85%                | 0%                   | 15%                    | 0%               | 0%                     | 0%                    | 0%                 | 0%                 | 0%                  | 0%                  | 0%                | 0%       | 0%               | 0%              |
| Peach                    | 0%                 | 0%                   | 100%                   | 0%               | 0%                     | 0%                    | 0%                 | 0%                 | 0%                  | 0%                  | 0%                | 0%       | 0%               | 0%              |
| Pistachio                | 87%                | 5%                   | 1%                     | 1%               | 0%                     | 0%                    | 1%                 | 0%                 | 0%                  | 0%                  | 3%                | 0%       | 1%               | 1%              |
| Plum                     | 0%                 | 0%                   | 100%                   | 0%               | 0%                     | 0%                    | 0%                 | 0%                 | 0%                  | 0%                  | 0%                | 0%       | 0%               | 0%              |
| Pomegranate              |                    |                      |                        |                  |                        |                       |                    |                    |                     |                     |                   |          |                  |                 |
| Potato                   | 61%                | 22%                  | 0%                     | 0%               | 0%                     | 0%                    | 0%                 | 0%                 | 0%                  | 0%                  | 0%                | 0%       | 17%              | 0%              |
| Tomato                   | 0%                 | 0%                   | 0%                     | 0%               | 7%                     | 75%                   | 1%                 | 14%                | 2%                  | 0%                  | 0%                | 0%       | 2%               | 0%              |
| Orange P.N. (no flowers) | 7%                 | 4%                   | 27%                    | 56%              | 0%                     | 0%                    | 0%                 | 0%                 | 0%                  | 0%                  | 0%                | 3%       | 1%               | 0%              |
| Orange P.N. (flowers)    | 2%                 | 0%                   | 30%                    | 67%              | 0%                     | 0%                    | 0%                 | 0%                 | 0%                  | 0%                  | 0%                | 1%       | 0%               | 0%              |
| Mand. W. Murcott         | 13%                | 33%                  | 32%                    | 1%               | 0%                     | 0%                    | 1%                 | 0%                 | 0%                  | 4%                  | 0%                | 9%       | 2%               | 4%              |
| Mand. Clementine         | 17%                | 6%                   | 14%                    | 1%               | 1%                     | 0%                    | 14%                | 0%                 | 0%                  | 0%                  | 0%                | 40%      | 5%               | 3%              |
| Lemon Eureka             |                    |                      |                        |                  |                        |                       |                    |                    |                     |                     |                   |          |                  |                 |

Data on citrus species measured in the same greenhouse campaign are reproduced from Fares et al. (2011) for comparison to the other crops and assessment of implications on air quality

Table S4: Composition of oxygenated monoterpene emissions measured in enclosure studies

| <b>Plant</b>             | <b>Linalool</b> | <b>Perillene</b> | <b>Eucalyptol</b> |
|--------------------------|-----------------|------------------|-------------------|
| Alfalfa                  |                 |                  |                   |
| Almond                   | 10%             | 90%              | 0%                |
| Carrot (RL)              | 94%             | 6%               | 0%                |
| Carrot (BN)              |                 |                  |                   |
| Cherry                   | 0%              | 100%             | 0%                |
| Corn                     |                 |                  |                   |
| Cotton Pima              | 0%              | 100%             | 0%                |
| Cotton Upland            | 4%              | 96%              | 0%                |
| Table Grape              | 0%              | 100%             | 0%                |
| Wine Grape               | 0%              | 100%             | 0%                |
| Liquidambar              | 0%              | 100%             | 0%                |
| Miscanthus               | 26%             | 0%               | 74%               |
| Olive                    | 0%              | 100%             | 0%                |
| Onion                    |                 |                  |                   |
| Peach                    | 0%              | 100%             | 0%                |
| Pistachio                | 16%             | 84%              | 0%                |
| Plum                     | 3%              | 97%              | 0%                |
| Pomegranate              | 0%              | 100%             | 0%                |
| Potato                   | 0%              | 100%             | 0%                |
| Tomato                   | 100%            | 0%               | 0%                |
| Orange P.N. (No Flowers) | 93%             | 6%               | 1%                |
| Orange P.N. (Flowers)    | 97%             | 2%               | 1%                |
| Mandarin W. Murcott      | 6%              | 94%              | 0%                |
| Mandarin Clementine      | 46%             | 54%              | 0%                |
| Lemon Eureka             |                 |                  |                   |

Data on citrus species measured in the same greenhouse campaign are reproduced from Fares et al. (2011) for comparison to the other crops and assessment of implications on air quality

Table S5: Composition of sesquiterpene emissions measured in enclosure studies

| <b>Plant</b>             | <b><math>\beta</math>-caryophyllene</b> | <b><math>\alpha</math>-humulene</b> |
|--------------------------|-----------------------------------------|-------------------------------------|
| Alfalfa                  |                                         |                                     |
| Almond                   | 77%                                     | 23%                                 |
| Carrot (RL)              | 100%                                    | 0%                                  |
| Carrot (BN)              | 100%                                    | 0%                                  |
| Cherry                   |                                         |                                     |
| Corn                     |                                         |                                     |
| Cotton Pima              | 54%                                     | 46%                                 |
| Cotton Upland            |                                         |                                     |
| Table Grape              | 69%                                     | 31%                                 |
| Wine Grape               | 100%                                    | 0%                                  |
| Liquidambar              | 100%                                    | 0%                                  |
| Miscanthus               | 7%                                      | 93%                                 |
| Olive                    | 100%                                    | 0%                                  |
| Onion                    |                                         |                                     |
| Peach                    |                                         |                                     |
| Pistachio                | 0%                                      | 100%                                |
| Plum                     |                                         |                                     |
| Pomegranate              | 90%                                     | 10%                                 |
| Potato                   | 98%                                     | 2%                                  |
| Tomato                   | 100%                                    | 0%                                  |
| Orange P.N. (No Flowers) | 100%                                    | 0%                                  |
| Orange P.N. (Flowers)    | 100%                                    | 0%                                  |
| Mandarin W. Murcott      | 33%                                     | 67%                                 |
| Mandarin Clementine      | 17%                                     | 83%                                 |
| Lemon Eureka             |                                         |                                     |

Data on citrus species measured in the same greenhouse campaign are reproduced from Fares et al. (2011) for comparison to the other crops and assessment of implications on air quality

Table S6: Basal emission factors (ngC gDM<sup>-1</sup> h<sup>-1</sup>) and beta values for methanol, acetaldehyde, acetone and isoprene for non-citrus crop plants investigated (N = sample size, r = correlation coefficient)

|                 | <b>Methanol</b>                  |                       | <b>Acetone</b>                    |                      | <b>Acetaldehyde</b>          |                      | <b>Isoprene</b>     |                      |
|-----------------|----------------------------------|-----------------------|-----------------------------------|----------------------|------------------------------|----------------------|---------------------|----------------------|
| <i>Species</i>  | <i>BEF±StDev(N)</i>              | <i>Beta (r)(N)</i>    | <i>BEF±StDev(N)</i>               | <i>Beta (r)(N)</i>   | <i>BEF±StDev(N)</i>          | <i>Beta (r)(N)</i>   | <i>BEF±StDev(N)</i> | <i>Beta (r)(N)</i>   |
| Alfalfa         | N.M.                             |                       | N.M.                              |                      | N.M.                         |                      | N.M.                |                      |
| Almond          | 620±300 (29) <sup>[24]</sup>     | 0.032<br>(0.30)(233)* | 84±110 (6) <sup>[24]</sup>        | 0.11<br>(0.17)(107)* | 89±60 (27) <sup>[24]</sup>   | 0.12<br>(0.42)(192)* | N.A.                |                      |
| Carrot (RL)     | 610±230 (19) <sup>[26]</sup>     | 0.050 (0.53)(87)      | 5600±6400<br>(19) <sup>[26]</sup> | 0.19 (0.68)(86)      | 540±360 (19) <sup>[26]</sup> | 0.22 (0.88)(76)      | 77±62 (4)           | 0.13 (0.66)(73)      |
| Carrot (BN)     | 510±190 (51) <sup>[27]</sup>     | 0.098 (0.58)(242)     | 35±9 (51) <sup>[27]</sup>         | 0.068<br>(0.69)(233) | 41±11 (51) <sup>[27]</sup>   | 0.15<br>(0.65)(180)  | 5.4±1.7 (5)         | 0.071<br>(0.33)(188) |
| Cherry          | 590±310 (46) <sup>[26]</sup>     | 0.043<br>(0.33)(251)* | 91±21 (38) <sup>[26]</sup>        | 0.12 (0.74)(185)     | 150±67 (38) <sup>[26]</sup>  | 0.19<br>(0.65)(166)  | 9.8±1.9 (3)         | 0.078<br>(0.37)(165) |
| Corn            | N.M.                             |                       | N.M.                              |                      | N.M.                         |                      | N.M.                |                      |
| Cotton (Pima)   | N.M.                             |                       | N.M.                              |                      | N.M.                         |                      | N.M.                |                      |
| Cotton (Upland) | N.M.                             |                       | N.M.                              |                      | N.M.                         |                      | N.M.                |                      |
| Table Grape     | 3600±950<br>(17) <sup>[24]</sup> | 0.064<br>(0.39)(113)* | 140±52 (17) <sup>[24]</sup>       | 0.12 (0.70)(108)     | 360±100 (17) <sup>[24]</sup> | 0.19<br>(0.53)(102)  | N.A.                |                      |
| Wine Grape      | N.M.                             |                       | N.M.                              |                      | N.M.                         |                      | N.M.                |                      |
| Liquidambar     | 350±140 (31) <sup>[26]</sup>     | 0.12 (0.59)(182)      | 53±19 (31) <sup>[26]</sup>        | 0.11 (0.67)(174)     | 70±39 (31) <sup>[26]</sup>   | 0.13<br>(0.34)(150)* | N.A.                |                      |
| Miscanthus      | 870±350 (21) <sup>[27]</sup>     | 0.084 (0.67)(87)      | 170±32 (21) <sup>[27]</sup>       | 0.077 (0.72)(83)     | 340±100 (21) <sup>[27]</sup> | 0.15 (0.71)(78)      | N.A.                |                      |
| Olive           | 150±15 (8) <sup>[26]</sup>       | 0.073 (0.83)(40)      | 16±2 (8) <sup>[26]</sup>          | 0.098 (0.83)(38)     | 36±5 (8) <sup>[26]</sup>     | 0.15 (0.73)(29)      | N.A.                |                      |
| Onion           | N.M.                             |                       | N.M.                              |                      | N.M.                         |                      | N.M.                |                      |
| Peach           | N.M.                             |                       | N.M.                              |                      | N.M.                         |                      | N.M.                |                      |
| Pistachio       | 48±57 (15)                       | 0.092 (0.43)(246)     | 24±4 (15)                         | 0.054<br>(0.39)(311) | 23±13 (15)                   | 0.20<br>(0.62)(238)  | 7.3±4.5 (15)        | 0.052<br>(0.19)(266) |
| Plum            | 210±50 (7) <sup>[26]</sup>       | 0.11 (0.79)(38)       | 89±16 (7) <sup>[26]</sup>         | 0.11 (0.91)(36)      | 84±26 (7) <sup>[26]</sup>    | 0.18 (0.91)(23)      | N.A.                |                      |
| Pomegranate     | 240±29 (4) <sup>[24]</sup>       | 0.038 (0.65)(28)      | 52±8 (4) <sup>[24]</sup>          | 0.092 (0.73)(27)     | 190±35 (4) <sup>[24]</sup>   | 0.24 (0.71)(17)      | N.A.                |                      |
| Potato          | 550±91 (5) <sup>[24]</sup>       | 0.11 (0.54)(27)       | 550±60 (5) <sup>[24]</sup>        | 0.17 (0.95)(25)      | 640±90 (5) <sup>[24]</sup>   | 0.26 (0.91)(20)      | N.A.                |                      |
| Tomato          | 9800±5700<br>(8) <sup>[27]</sup> | 0.16 (0.57)(86)       | 410±170 (8) <sup>[27]</sup>       | 0.082<br>(0.46)(82)* | 570±190 (8) <sup>[27]</sup>  | 0.13 (0.72)(81)      | 43±32 (2)           | 0.017 (0.07)(74)     |

Notes: N.M.=No Measurements, N.D.=Below Detection Limit, N.A.=No Basal Condition Met, N.B.=Beta Value Analysis Inaccurate

When the BEF was determined at a lower temperature and adjusted, the temperature it was determined at is indicated after the BEF as <sup>[C]</sup>, the value was adjusted using the calculated beta unless the correlation coefficient for beta was below 0.5, then a default beta of 0.1 was used and the beta column is marked with \*



Table S7: Observed isoprene fluxes (with environmental parameters) for plant species studied during greenhouse enclosure campaign

| Crop          | Isoprene Flux (ngC gDM <sup>-1</sup> h <sup>-1</sup> ) |            | Leaf Temperature (°C) |            | PAR (μmol m <sup>-2</sup> s <sup>-1</sup> ) |            | Sample Size (N) |
|---------------|--------------------------------------------------------|------------|-----------------------|------------|---------------------------------------------|------------|-----------------|
|               | <i>Min</i>                                             | <i>Max</i> | <i>Min</i>            | <i>Max</i> | <i>Min</i>                                  | <i>Max</i> |                 |
| Alfalfa       |                                                        |            |                       |            |                                             |            | 0               |
| Almond        | 0.014                                                  | 16         | 16.4                  | 27.6       | 259                                         | 1040       | 53              |
| Carrot (RL)   | 5.1                                                    | 137        | 19.6                  | 30.6       | 268                                         | 1020       | 29              |
| Carrot (BN)   | 0.20                                                   | 12         | 22.7                  | 30.2       | 201                                         | 1020       | 58              |
| Cherry        | 1.0                                                    | 20         | 23.7                  | 29.2       | 201                                         | 1150       | 39              |
| Corn          |                                                        |            |                       |            |                                             |            | 0               |
| Cotton Pima   |                                                        |            |                       |            |                                             |            | 0               |
| Cotton Upland |                                                        |            |                       |            |                                             |            | 0               |
| Table Grape   | 4.8                                                    | 29         | 20.0                  | 27.8       | 220                                         | 977        | 24              |
| Wine Grape    |                                                        |            |                       |            |                                             |            | 0               |
| Liquidambar   | 1250                                                   | 5600       | 24.9                  | 27.1       | 202                                         | 863        | 31              |
| Miscanthus    | 2.5                                                    | 55         | 25.6                  | 30.6       | 215                                         | 634        | 21              |
| Olive         | 9.0                                                    | 14         | 26.1                  | 28.0       | 205                                         | 936        | 8               |
| Onion         |                                                        |            |                       |            |                                             |            | 0               |
| Peach         |                                                        |            |                       |            |                                             |            | 0               |
| Pistachio     | 0.43                                                   | 23         | 18.6                  | 30.8       | 203                                         | 1040       | 86              |
| Plum          | 3.1                                                    | 12         | 25.6                  | 27.7       | 257                                         | 904        | 7               |
| Pomegranate   | 2.2                                                    | 9.5        | 20.4                  | 26.2       | 201                                         | 972        | 6               |
| Potato        | 0.25                                                   | 21         | 23.2                  | 25.6       | 612                                         | 959        | 5               |
| Tomato        | 16                                                     | 73         | 23.0                  | 28.6       | 263                                         | 1060       | 11              |

Note: The values in this table are provided to show minimal isoprene emissions for most crops since BEFs could not be calculated for many of the compounds
